# Supplementary material
Source: publisher site journal article supplement (https://www.dovepress.com/article/570594)
Supplement: Supplementary file 1 [file 570954%20Supplementary%20Material.docx]

**Supplementary Fig. S1 Study flow diagram.**

Sichuan provincial people’s hospital (n=369 individuals)

101 participants were excluded:

No T2DM diagnosis date (51 individuals),

Excluded participants with date mismatch (follow-up, DM diagnosis, deaths)=50 individuals

Sample size after quality control

(n=268 individuals)

48 participants were excluded due to no baseline information or based on inclusion criterion:

No NLR information: 16 individuals,

No HbA1c information:12 individuals,

No eGFR information: 9 individuals,

No Lipid information: 11 individuals,

Analysed cohort

(n=220 individuals)

**Supplementary Fig. S2 Overall survival for the incidence of DN.** Incident DN=268, Median survival time= 2.02 years (95% CI: 1.81 years, 2.25 years).


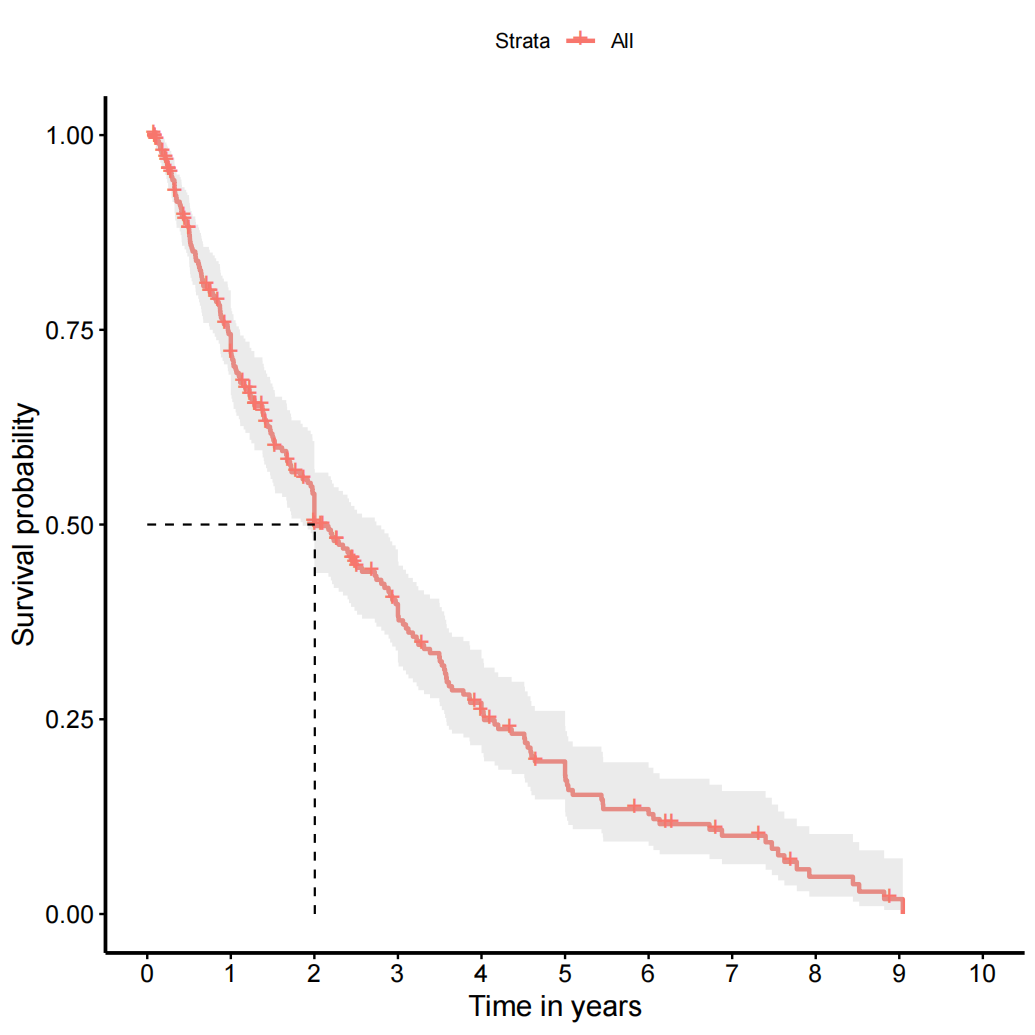


**Supplementary Fig. S3 Survival for the incidence of DN for the analyzed cohort.** Incident DN =220, Median survival time=1.85 years (95% CI: 1.66 years, 2.04 years years**)**


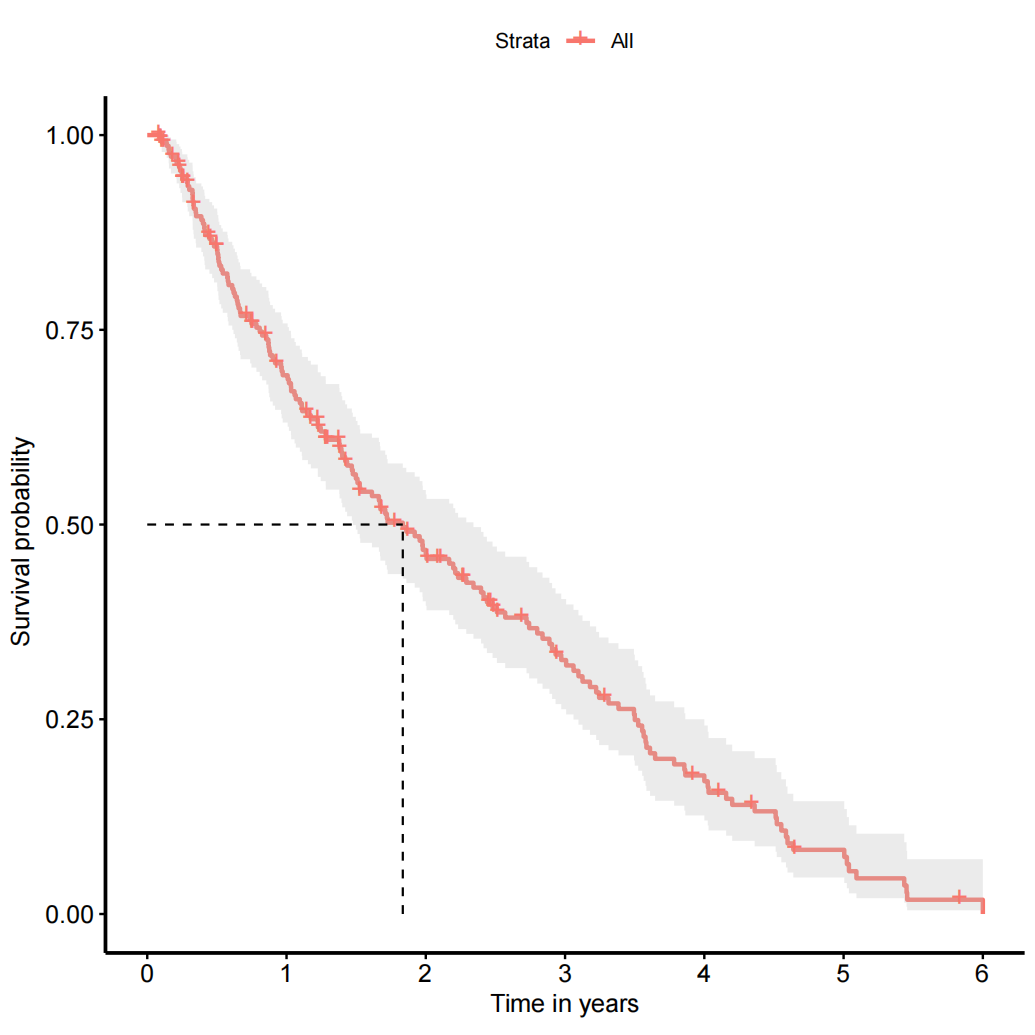


**Supplementary Fig. S4 Time-dependent ROC chart of NLR for predicting DN.**


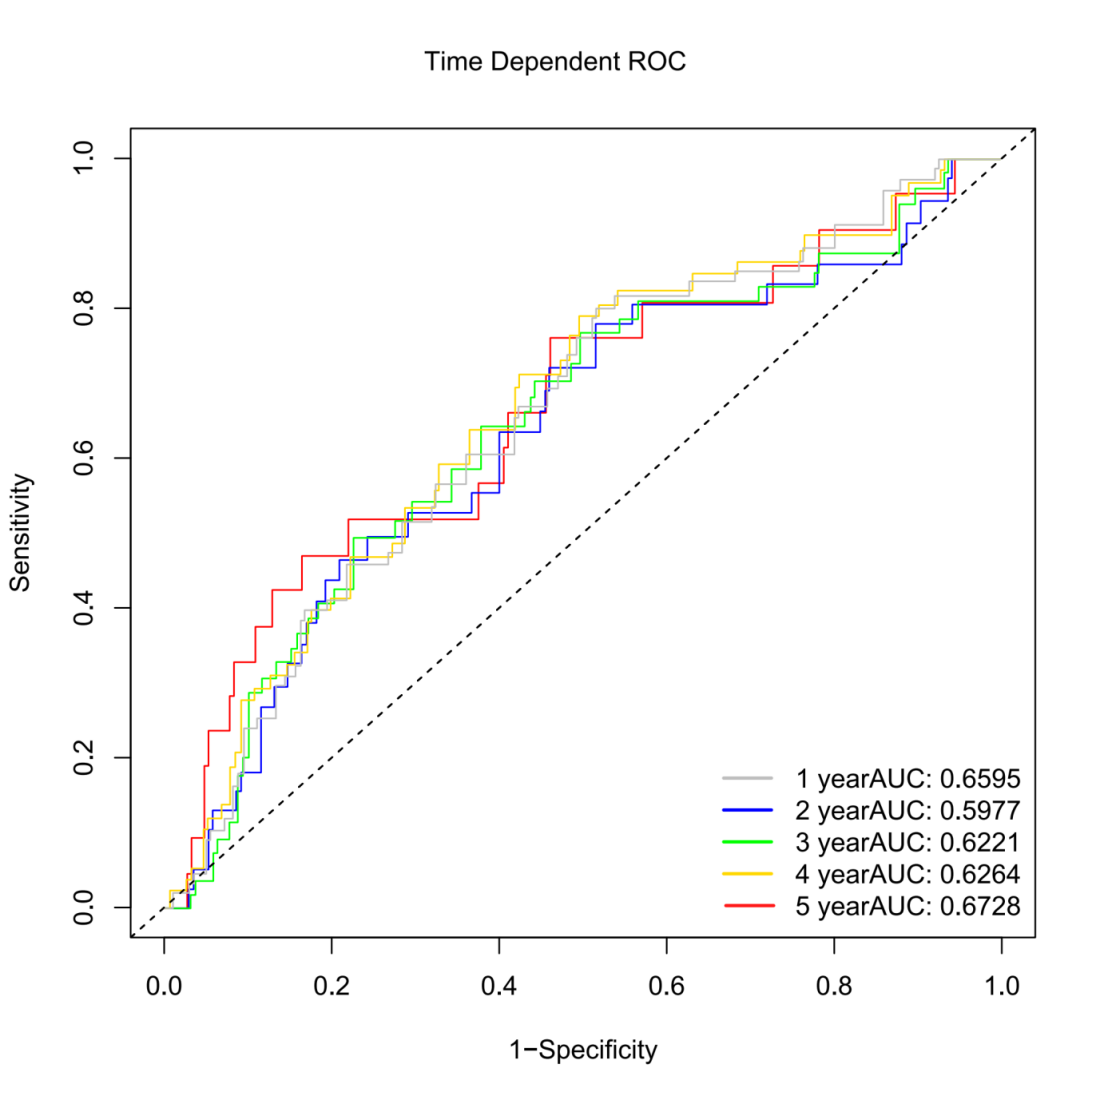


**Supplementary Fig. S5 Event-free survival (EFS) plots showing the risk associated with demographic and clinical covariates for experiencing DN for a 6 year follow-up period (n=220).**


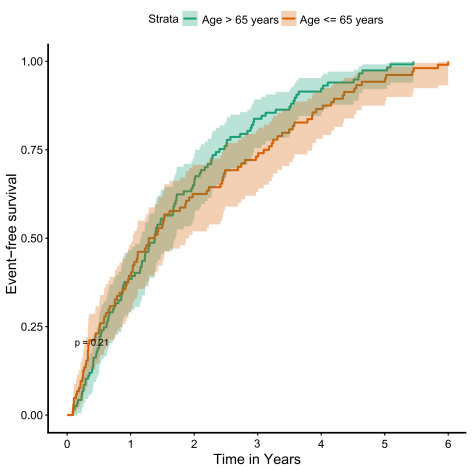

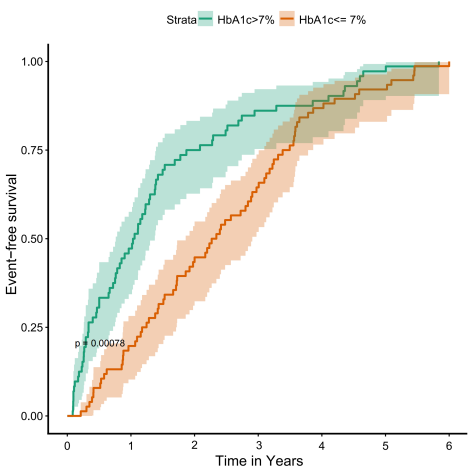

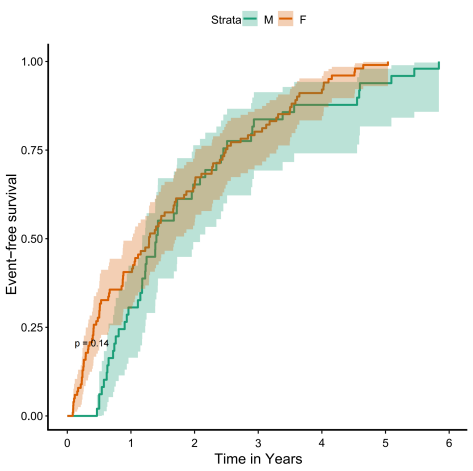

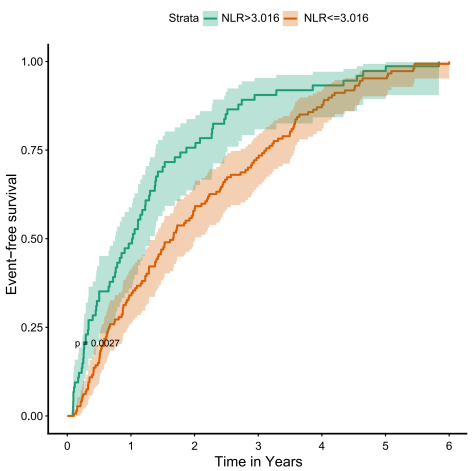

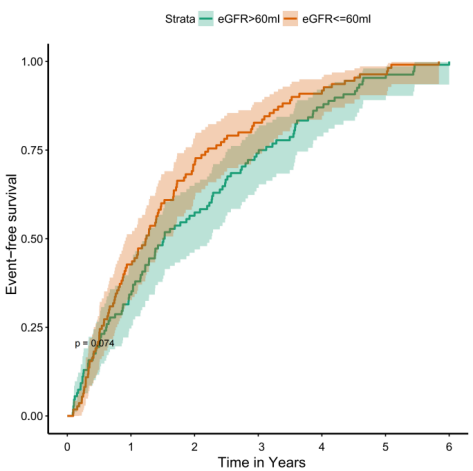

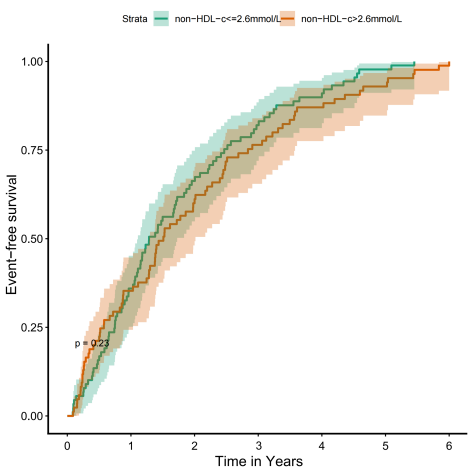

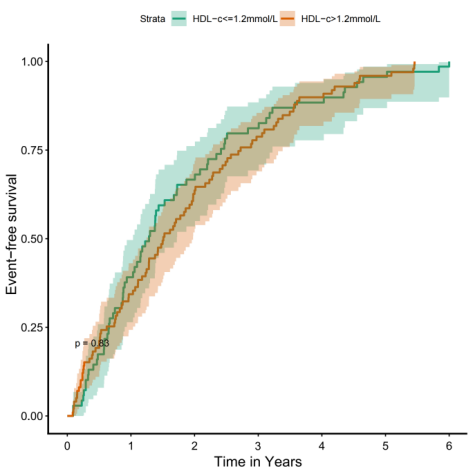

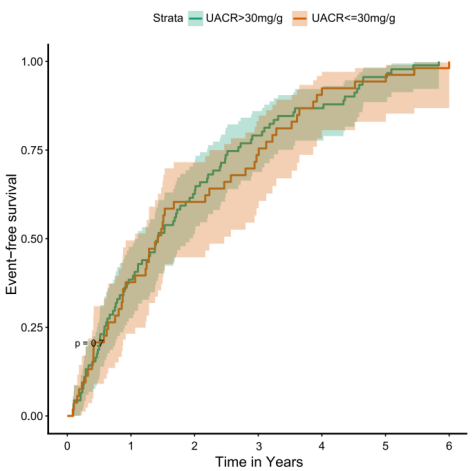

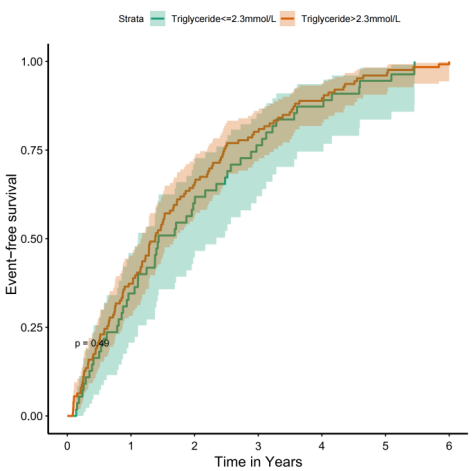


**Supplementary Fig. S6 Cumulative Incidence Function (CIF) plots of covariates for experiencing DN for a 6 year follow-up period(n=220).**


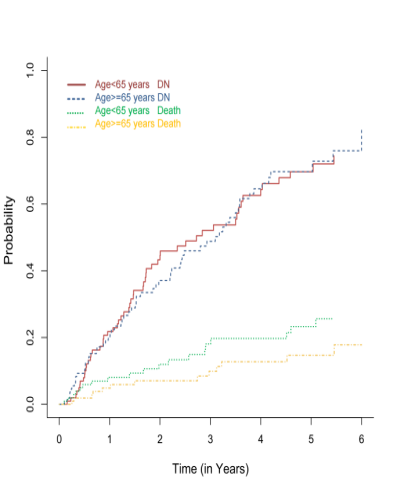

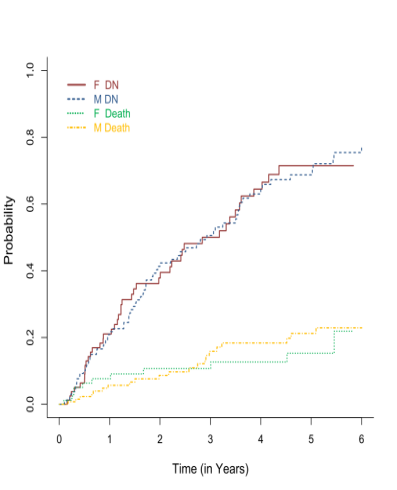

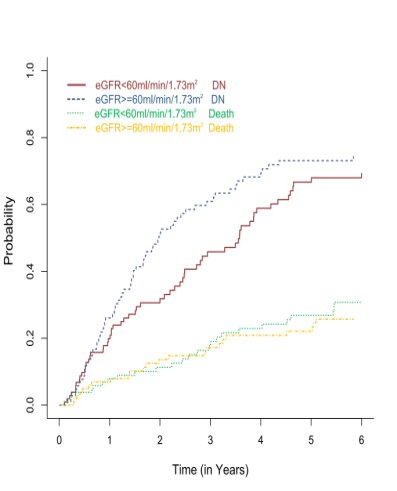

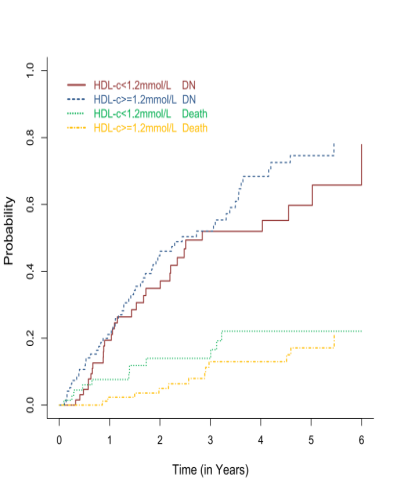

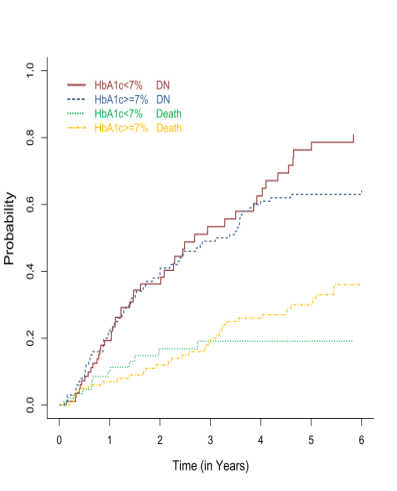

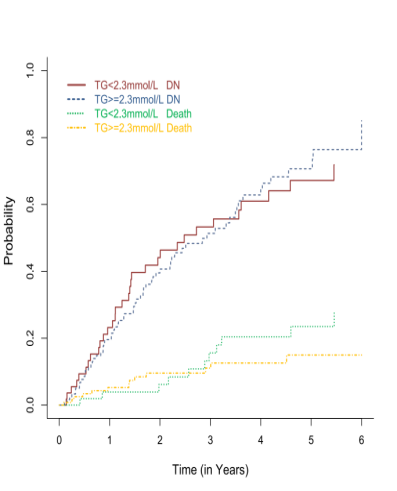

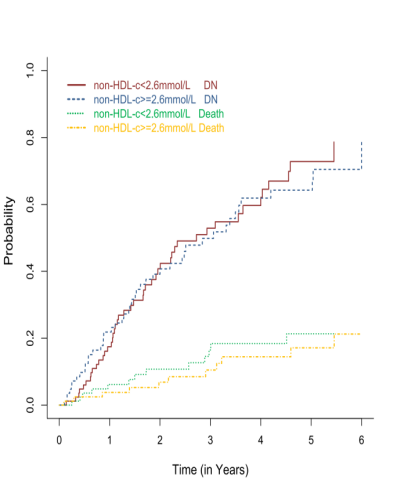

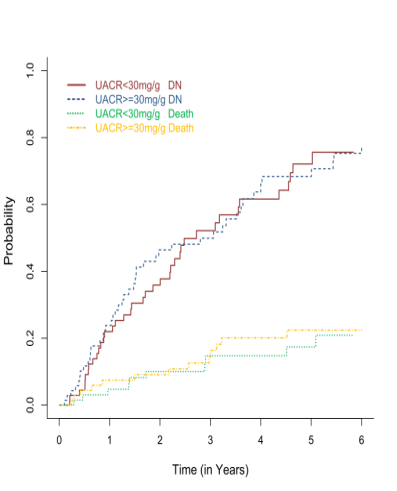


**Supplementary Fig. S7 Bootstrap-derived NLR Sub-distribution Hazard Ratio (sHR).**

**
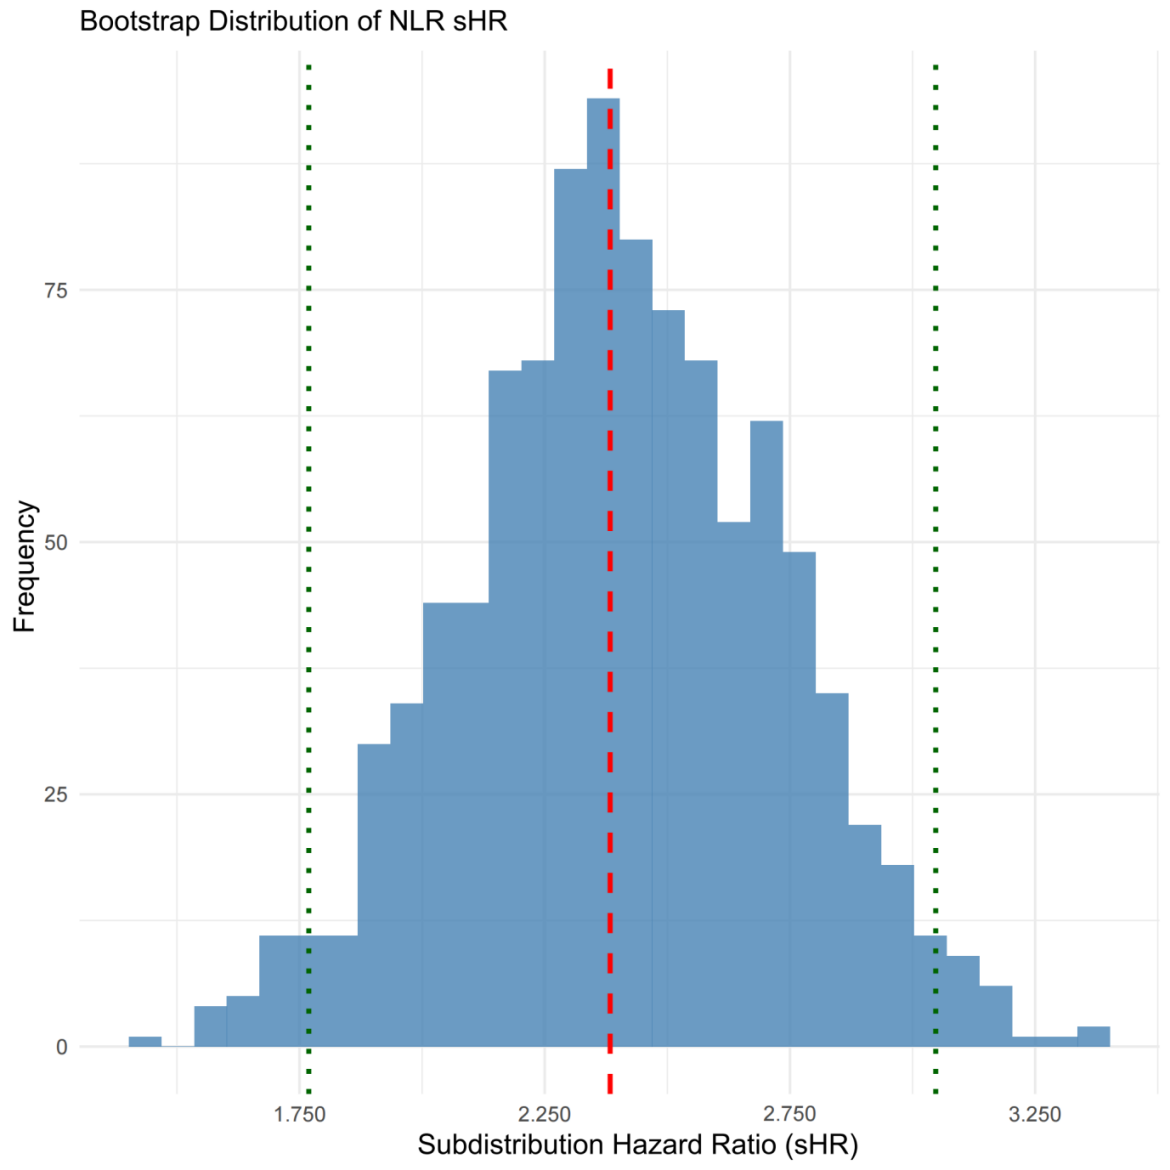
**

**Supplementary Fig. S8 Risk for DN predicted by NLR stratified by quartiles of eGFR and UACR estimated from covariate-adjusted FGR model.**


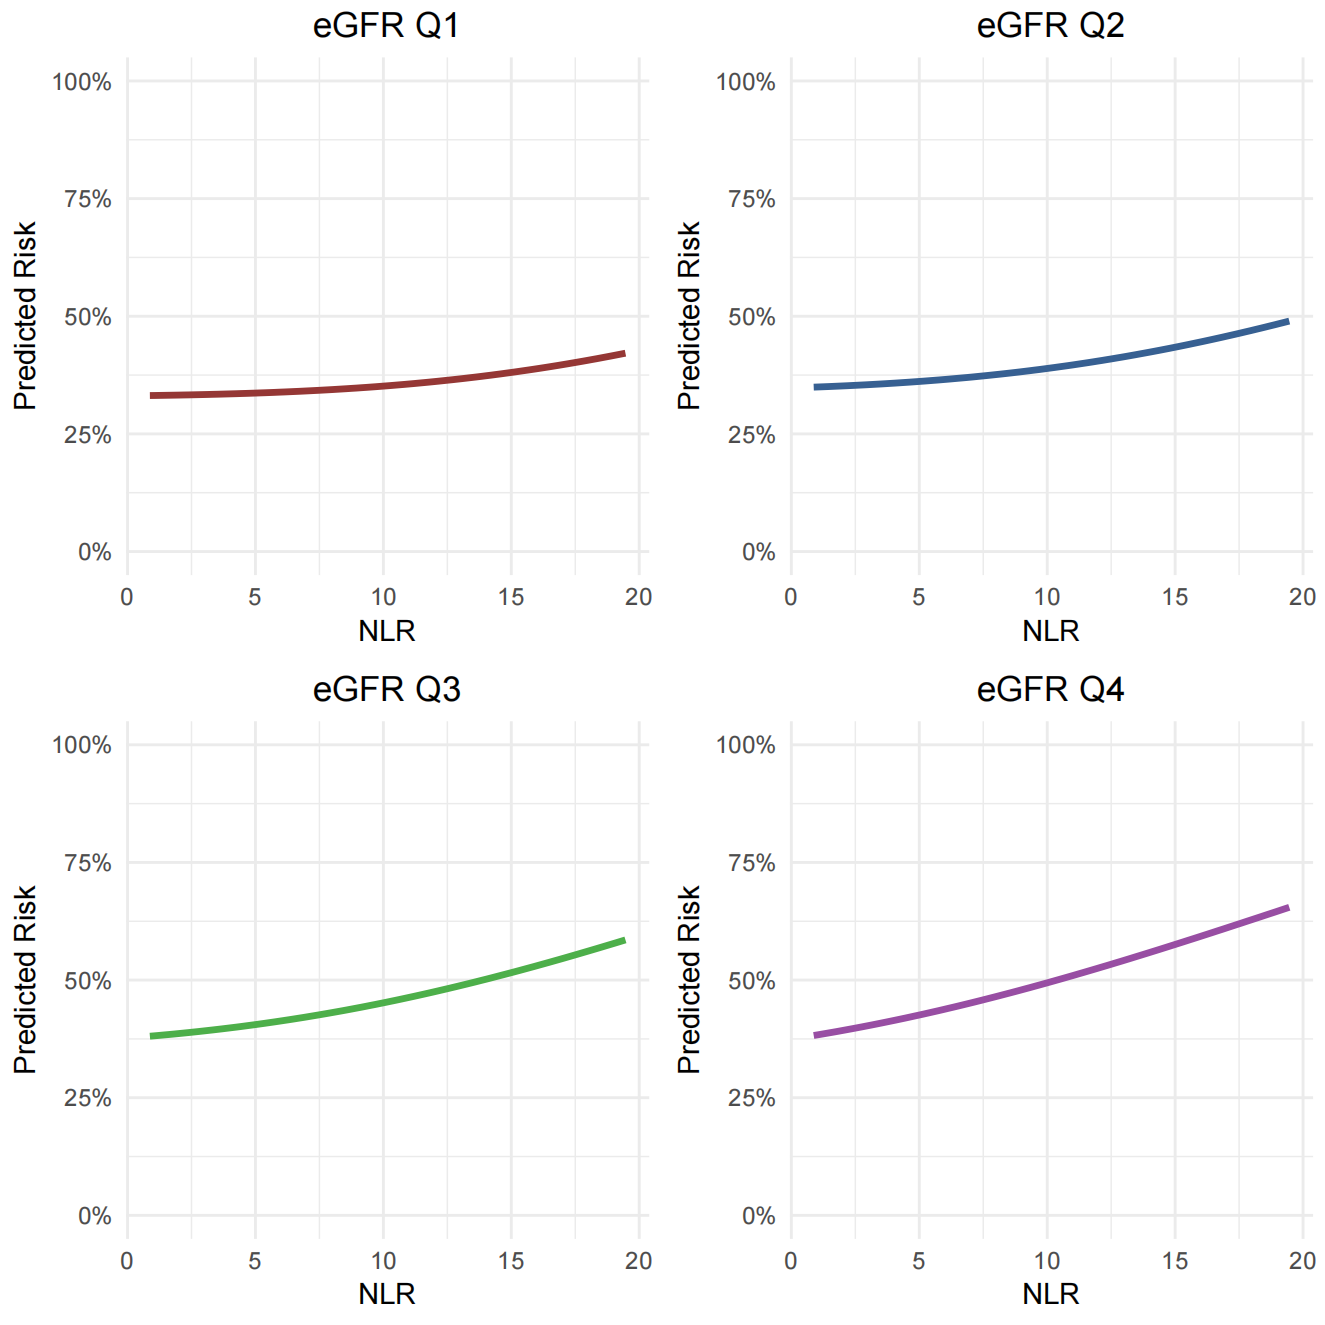


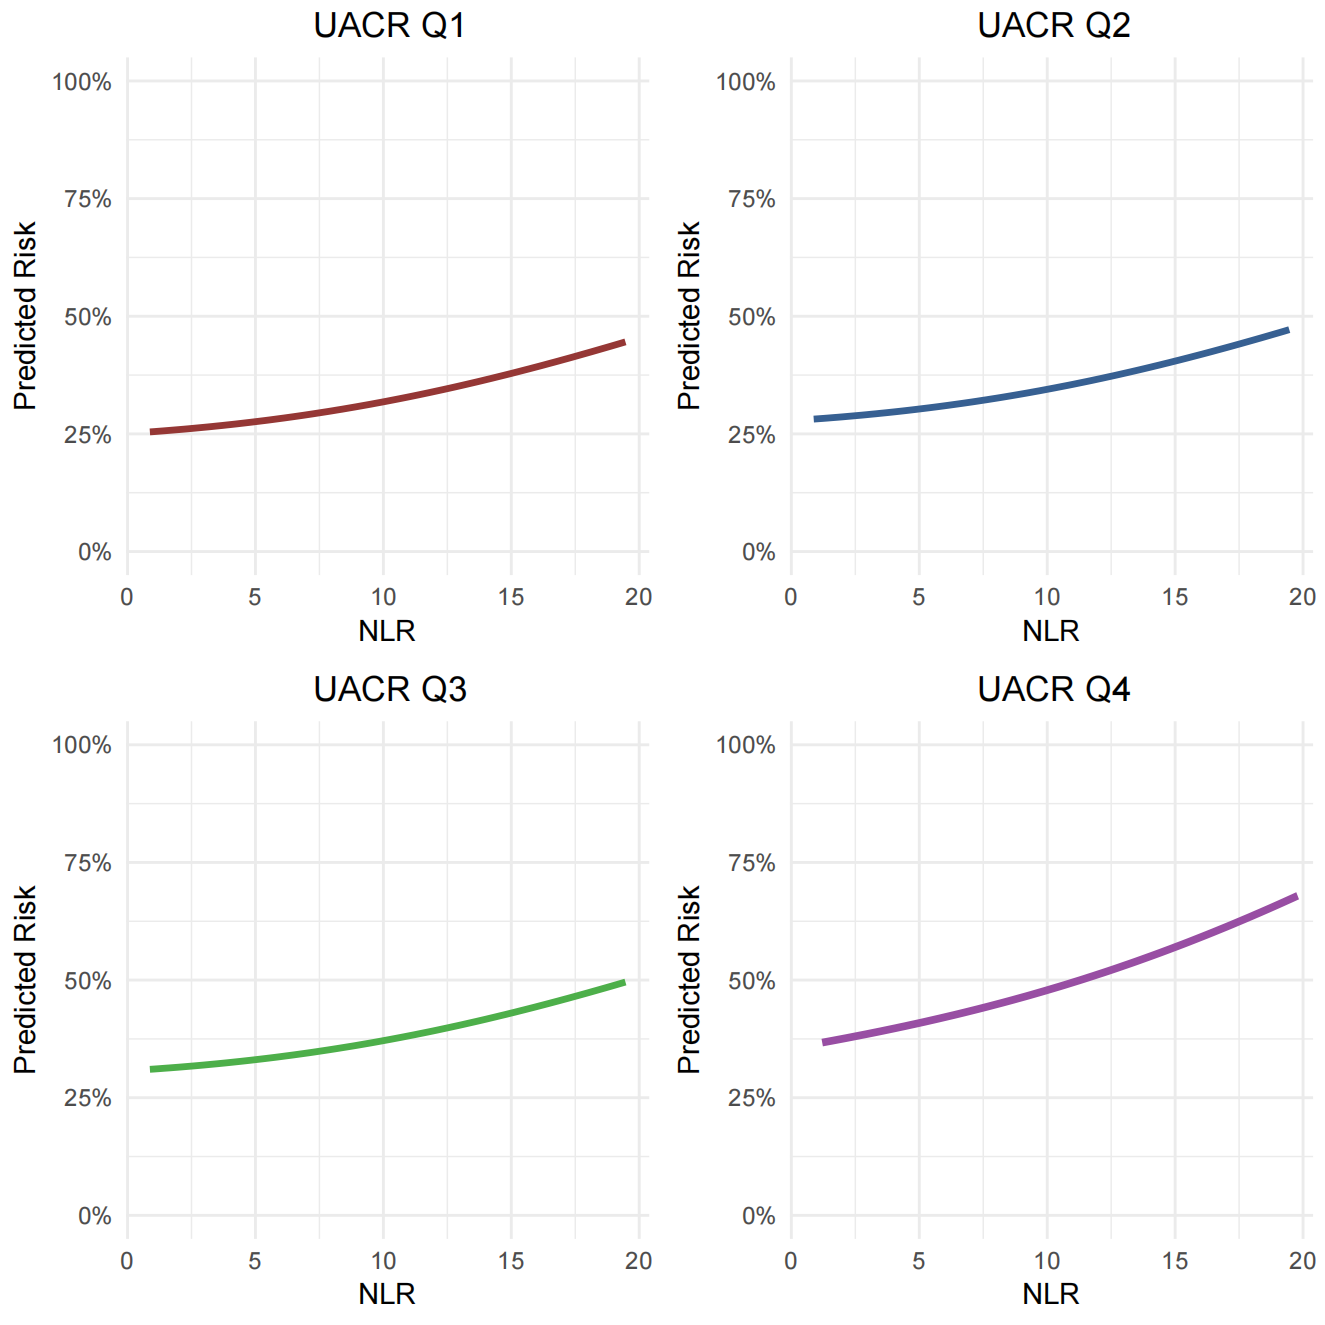


**Supplementary Table. S1 The stratified analysis of baseline NLR by outcome status**

| Variable | Overall (n=220) | DN Progressors (n=133) | DN-Free (n=67) | Competing Events (n=20) |
| --- | --- | --- | --- | --- |
| Age (years) | 64 (IQR:55-72) | 63 (IQR:54-72) | 66 (IQR:57-73) | 62 (IQR:52-71) |
| HbA1c (%) | 7.1(IQR:6.4-8.4) | 7.1 (IQR:6.6-8.0) | 7.1(IQR:6.3-8.1) | 7.2 (IQR:6.8-8.2) |
| NLR | 2.6(IQR: 1.8-4.0) | 2.7(IQR: 2.0-4.1) | 2.5 (IQR:1.7-3.8) | 2.6 (IQR:1.9-3.5) |
